# Supplementary material for: BrGDGTs-based seasonal paleotemperature reconstruction for the last 15,000 years from a shallow lake on the eastern Tibetan Plateau
Source: Copernicus journal article supplement (doi:10.5194/cp-2023-32), 2023-05-24
Supplement: Supplementary file 1 [file cp-2023-32-supplement.pdf]

1 BrGDGTs-based seasonal paleotemperature reconstruction for the last 15,000 years from a  
2 shallow lake on the eastern Tibetan Plateau

3 Xiaohuan Hou <sup>a</sup>, Nannan Wang <sup>a</sup>, Zhe Sun <sup>b</sup>, Kan Yuan <sup>a, c</sup>, Xianyong Cao <sup>a</sup>, Juzhi Hou <sup>a\*</sup>

4 <sup>a</sup> *Group of Alpine Paleoecology and Human Adaptation (ALPHA), State Key Laboratory of Tibetan*  
5 *Plateau Earth System, Resources and Environment (TPESRE), Institute of Tibetan Plateau Research,*  
6 *Chinese Academy of Sciences, Beijing 100101, China*

7 <sup>b</sup> *Institute of Geography and Resources Science, Sichuan Normal University, Chengdu, 610066, China*

8 <sup>c</sup> *University of Chinese Academy of Sciences, Beijing 100049, China*

9

10 \*Corresponding author.

11 Group of Alpine Paleoecology and Human Adaptation, State Key Laboratory of Tibetan  
12 Plateau Earth System, Resources and Environment, Institute of Tibetan Plateau Research,  
13 Chinese Academy of Sciences, Beijing 100101, China.

14 E-mail address: houjz@itpcas.ac.cn (J. Hou)

15 **Supplementary Figures**

iGDGTs

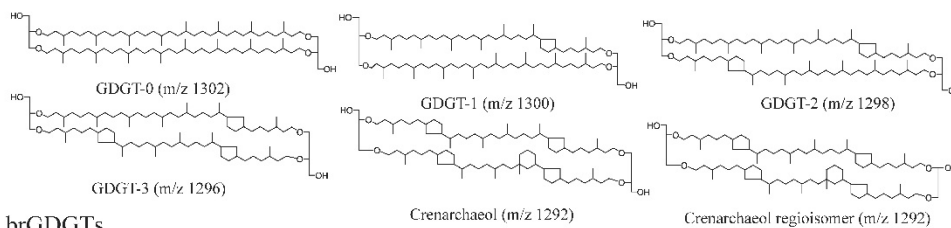

brGDGTs

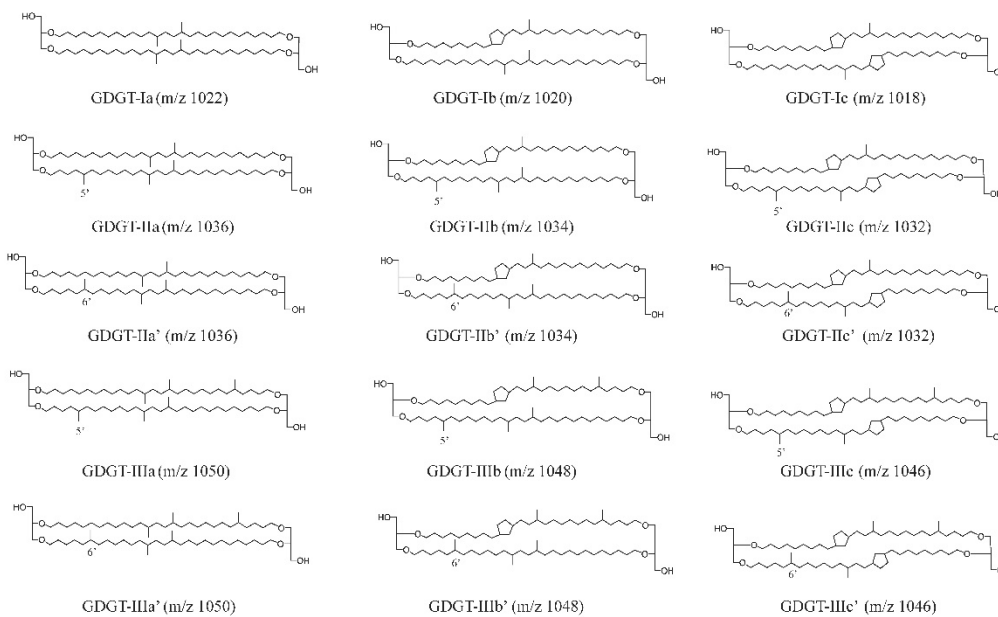

16

17 **Fig. S1 Molecular structures of GDGTs.**

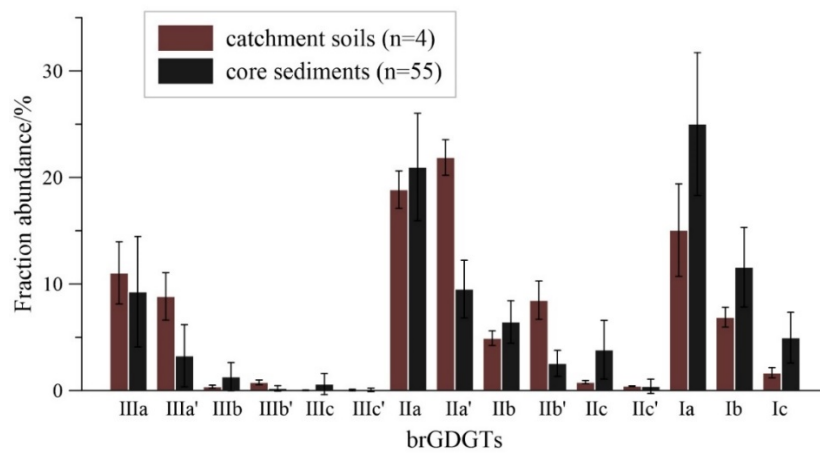

18

19 Fig. S2 Mean fractional abundances and standard deviations of brGDGTs in the downcore sediments and  
 20 catchment soil samples at Gahai lake.

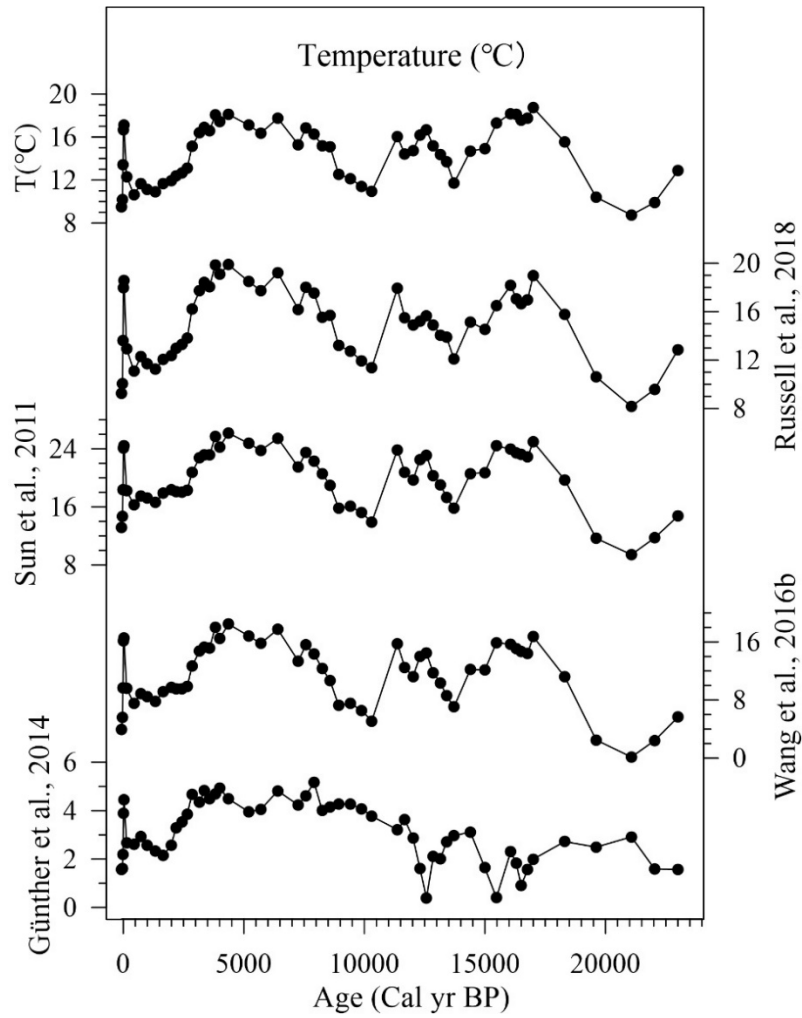

23 Fig. S3 Comparison of reconstructed MAAT records at Gahai lake based on different temperature  
24 calibrations from lakes. a. Lines with the same color indicate a similar trend in the reconstructions. Red line  
25 represents the MAF result using the calibration proposed by Martínez-Sosa et al. (2021) which is adopted in  
26 this study.
